# Supplementary material
Source: PubMed Central journal article supplement (PMC3596649)
Supplement: bph0168-1445-SD1.pdf [file bph0168-1445-SD1.pdf]

SUPPLEMENTARY INFORMATION**Inhibition of endothelial cell Ca<sup>2+</sup> entry and Transient Receptor Potential channels by Sigma-1 receptor ligands**

Mohamed S Amer<sup>1,2,4</sup>, Lynn McKeown<sup>1,2</sup>, Sarka Tumova<sup>1,2</sup>, Ruifeng Liu<sup>1,2</sup>, Victoria AL Seymour<sup>1,2</sup>, Lesley A. Wilson<sup>1,2</sup>, Jacqueline Naylor<sup>1,2</sup>, Katriona Greenhalgh<sup>1,2</sup>, Bing Hou<sup>1,2</sup>, Yasser Majeed<sup>1,2</sup>, Paul Turner<sup>1,2</sup>, Alicia Sedo<sup>1,2</sup>, David J O'Regan<sup>5</sup>, Jing Li<sup>1,2</sup>, Robin S Bon<sup>1,6</sup>, Karen E Porter<sup>1,3</sup>, David J Beech<sup>1,2\*</sup>

<sup>1</sup>Multidisciplinary Cardiovascular Research Centre and <sup>2</sup>Faculty of Biological Sciences and <sup>3</sup>Faculty of Medicine & Health, University of Leeds, Leeds, LS2 9JT, UK. <sup>4</sup>Clinical Physiology Department, Faculty of Medicine, Menoufiya University, Egypt. <sup>5</sup>Department of Cardiac Surgery, Leeds General Infirmary, Great George Street, Leeds, LS1 3EX. <sup>6</sup>School of Chemistry, University of Leeds, Leeds, LS2 9JT, UK

\*Author for correspondence: Prof David J Beech, Garstang Building, Mount Preston Street, Faculty of Biological Sciences, University of Leeds, Leeds, LS2 9JT, England, UK; d.j.beech@leeds.ac.uk; Tel +44 (0) 113 34 34323/4727; Fax +44 (0) 113 34 34228.

**SUPPLEMENTARY FIGURE LEGENDS**

**Supplementary Figure 1. Supporting data for effects of Sig1R ligands on Ca<sup>2+</sup> signals in SVECs.** Data are from intracellular Ca<sup>2+</sup> measurements. **(a)** Mean data to accompany those in Figure 1d, showing analysis of the peak responses to histamine (n/N=3/12 for each experiment). **(b, c)** Example data showing effects of 10 μM histamine in the presence of 100 μM 4-IBP **(b)** or 100 μM SKF10047 **(c)** compared with vehicle controls (N=4 for each). The ligands were applied 30 min before testing histamine and maintained throughout the experiments. **(d)** Example data showing effects of 100 ng/ml VEGF in the presence of 100 μM BD1063 compared with the vehicle control. BD1063 was applied for 30 min before testing of VEGF and was maintained throughout the experiment. **(e)** Mean data for the effects of Sig1R ligands (100 μM) on the rate of rise of the VEGF response (n/N=3/12 for each), from the same experiments analysed in Figure 1e. **(f)** Dependence of the response to H<sub>2</sub>O<sub>2</sub> on extracellular Ca<sup>2+</sup>. Typical experiment showing 1 mM H<sub>2</sub>O<sub>2</sub> responses in the presence (1.5 Ca<sup>2+</sup>) or absence (0 Ca<sup>2+</sup>) of 1.5 mM extracellular Ca<sup>2+</sup> (N=4 for each). **(g)** Example data showing effects of 1 mM hydrogen peroxide (H<sub>2</sub>O<sub>2</sub>) in the presence of 100 μM BD1063 compared with the vehicle control.

**Supplementary Figure 2. Lack of effect of Sig1R ligands on thapsigargin-evoked Ca<sup>2+</sup>-release in SVECs.** Data were generated by measurement of intracellular Ca<sup>2+</sup> in SVECs. **(a-d)** Example data showing effects of 1 μM thapsigargin in the absence of extracellular Ca<sup>2+</sup> (0 Ca<sup>2+</sup>) but the presence of 100 μM BD1047 **(a)**, 100 μM BD1063 **(b)**, 100 μM 4-IBP **(c)** or 100 μM SKF10047 **(d)** compared with vehicle controls (N=4 for each). The compounds were applied 30 min before testing of thapsigargin and were maintained throughout the experiments. **(e)** Mean data for the types of experiment illustrated in **(a-d)**, showing analysis of the peak responses to thapsigargin (n/N=3/14). 4-IBP data are shown separately because of the use of a different vehicle control in these experiments.

**Supplementary Figure 3. Effects of Sig1R ligands on TRPC5, TRPM2 and TRPM3 channels in HEK 293 cells.** (a) Example  $\text{Ca}^{2+}$  measurement data for TRPC5 cells, showing responses to 10  $\mu\text{M}$  LPC in the presence of 100  $\mu\text{M}$  BD1047 or the vehicle control (N=6 for each). Also shown is the lack of effect of  $\text{Gd}^{3+}$  in cells lacking TRPC5 expression (Tet-). (b) Mean data of the type shown in Figure 2b but for maximum responses to 5  $\mu\text{M}$  sphingosine-1-phosphate (S1P) (n/N=3/18 for each condition). (c) Example  $\text{Ca}^{2+}$  measurement data for TRPM2 cells, showing responses to 1 mM  $\text{H}_2\text{O}_2$  in the presence of 100  $\mu\text{M}$  BD1047 or the vehicle control (N=8 for each). (d) Whole-cell voltage-clamp data from TRPM3 cells showing current-voltage relationships (I-Vs) for the experiment shown in Figure 3d.

**Supplementary Figure 4. Absence of stimulatory effects of Sig1R ligands on TRPC5 or TRPM3.** (a) Data were generated by  $\text{Ca}^{2+}$  measurement from HEK 293 cells induced to express TRPC5 (Tet+) or not induced to express TRPC5 (Tet-). Cells were exposed to 100  $\mu\text{M}$   $\text{Gd}^{3+}$  (n/N=4/36) (a positive control), 100  $\mu\text{M}$  SKF10047, 100  $\mu\text{M}$  4-IBP, 100  $\mu\text{M}$  BD1063 or 100  $\mu\text{M}$  BD1047 (n/N=3/18). (b) Data were generated by  $\text{Ca}^{2+}$  measurement from HEK 293 cells induced to express TRPM3 (Tet+) or not induced to express TRPM3 (Tet-). Cells were exposed to 5  $\mu\text{M}$  PregS (n/N=4/32) (a positive control), 100  $\mu\text{M}$  SKF10047, 100  $\mu\text{M}$  4-IBP, 100  $\mu\text{M}$  BD1063 or 100  $\mu\text{M}$  BD1047 (n/N=3/18).

**Supplementary Figure 5. Validation of Sig1R depletion.** (a) PCR products from SVECs transfected with scrambled siRNA (sc.si) or Sig1R siRNA (Sig1R.si). Expected product sizes were 196 ( $\beta$ -actin, i) and 222 (Sig1R, ii) base pairs (bp). The 100 bp DNA marker ladder is on the left (M) and an example Sig1R PCR reaction without reverse transcriptase (-RT) is on the right. (b) As for (a) but mRNA was isolated from HEK 293 cells. (c) Western blot with anti-Sig1R antibody for HEK 293 cell proteins after transfection with scrambled (control) siRNA (sc.si) or Sig1R siRNA (Sig1R.si).

**Supplementary Figure 6. Supporting data suggesting lack of functional role of the Sig1R.** (a) Mean  $\text{Ca}^{2+}$  measurement data for effects of sc.si (control) and Sig1R siRNA (Sig1R.si) on 10  $\mu\text{M}$  histamine-evoked signals (n/N=3/12). (b) Mean data for the effect of 50  $\mu\text{M}$  BD1063 (30 min treatment) on 10  $\mu\text{M}$  histamine-evoked  $\text{Ca}^{2+}$  signals in SVECs transfected with sc.si or Sig1R.si (n/N=3/12 for each data set). Data are shown for the peak response to histamine and the response 5 min after the application of histamine. (c, d) Example  $\text{Ca}^{2+}$  measurement data showing 10  $\mu\text{M}$  LPC-evoked TRPC5 activity (c, N=5) and 5  $\mu\text{M}$  PregS-evoked TRPM3 activity (d, N=4) in HEK 293 cells transfected with sc.si or Sig1R.si. (e) Mean data for the maximum responses to 5  $\mu\text{M}$  PregS in TRPM3 cells treated with sc.si or Sig1R.si in the presence of 100  $\mu\text{M}$  BD1047 or vehicle control (n/N=3/16 for each condition).

**Supplementary Figure 7. Supporting data for Sig1R staining and localisation of TRPC5-GFP and TRPM3-YFP channels.** (a) Peptide-specificity of endogenous Sig1R detection by anti-Sig1R antibody. Example images are shown of HEK 293 cells exposed to anti-Sig1R antibody (upper image) or anti-Sig1R antibody preadsorbed to its antigenic peptide (lower image). Positive labeling is shown by the red of the secondary antibody. The blue is from DAPI, the counter nuclear stain. (b, c) Images show typical non-induced HEK 293 cells transiently expressing TRPC5-GFP (b) or TRPM3-YFP (c). Fluorescence from the GFP or YFP is shown in

green. Cells were stained with anti-Sig1R antibody (red). Cells were pre-treated with 100  $\mu$ M SKF10047 (**b**) or BD1047 (**c**).

**Supplementary Figure 8. Comparison of the chemical structures of BD1063, 4-IBP, BD1047, resveratrol, and diethylstilbestrol.** Basic nitrogens are highlighted in red. (**a**) The lowest energy conformations of BD1063 (1) and 4-IBP (2) (chair, all equatorial) show a common structural motif, which is represented by preliminary pharmacophore model **3**. (**b**) BD1047 (4) can be considered a ring-opened analogue of BD1063 (1) with significant conformational freedom, and one of its possible conformations is highly similar to that of BD1063. Being an analogue of the common metal chelator tetramethylethylenediamine (TMEDA, 6), BD1047 might also act as a ligand for metal ions ( $M^{n+}$ ) such as  $Mg^{2+}$ ,  $Zn^{2+}$ ,  $Cu^{2+}$  and  $Ca^{2+}$  (5) in the same way as TMEDA (7). (**c**) In its lowest energy conformation, resveratrol (8) is flat because of conjugation of all  $\pi$  bonds. The ethyl groups of diethylstilbestrol (9) force rotation of its aromatic groups by ca.  $90^\circ$ , thereby preventing full conjugation. Thus, despite sharing a hydroxylated stilbene scaffold, resveratrol and diethylstilbestrol have markedly different 3D structures in their lowest energy conformations.

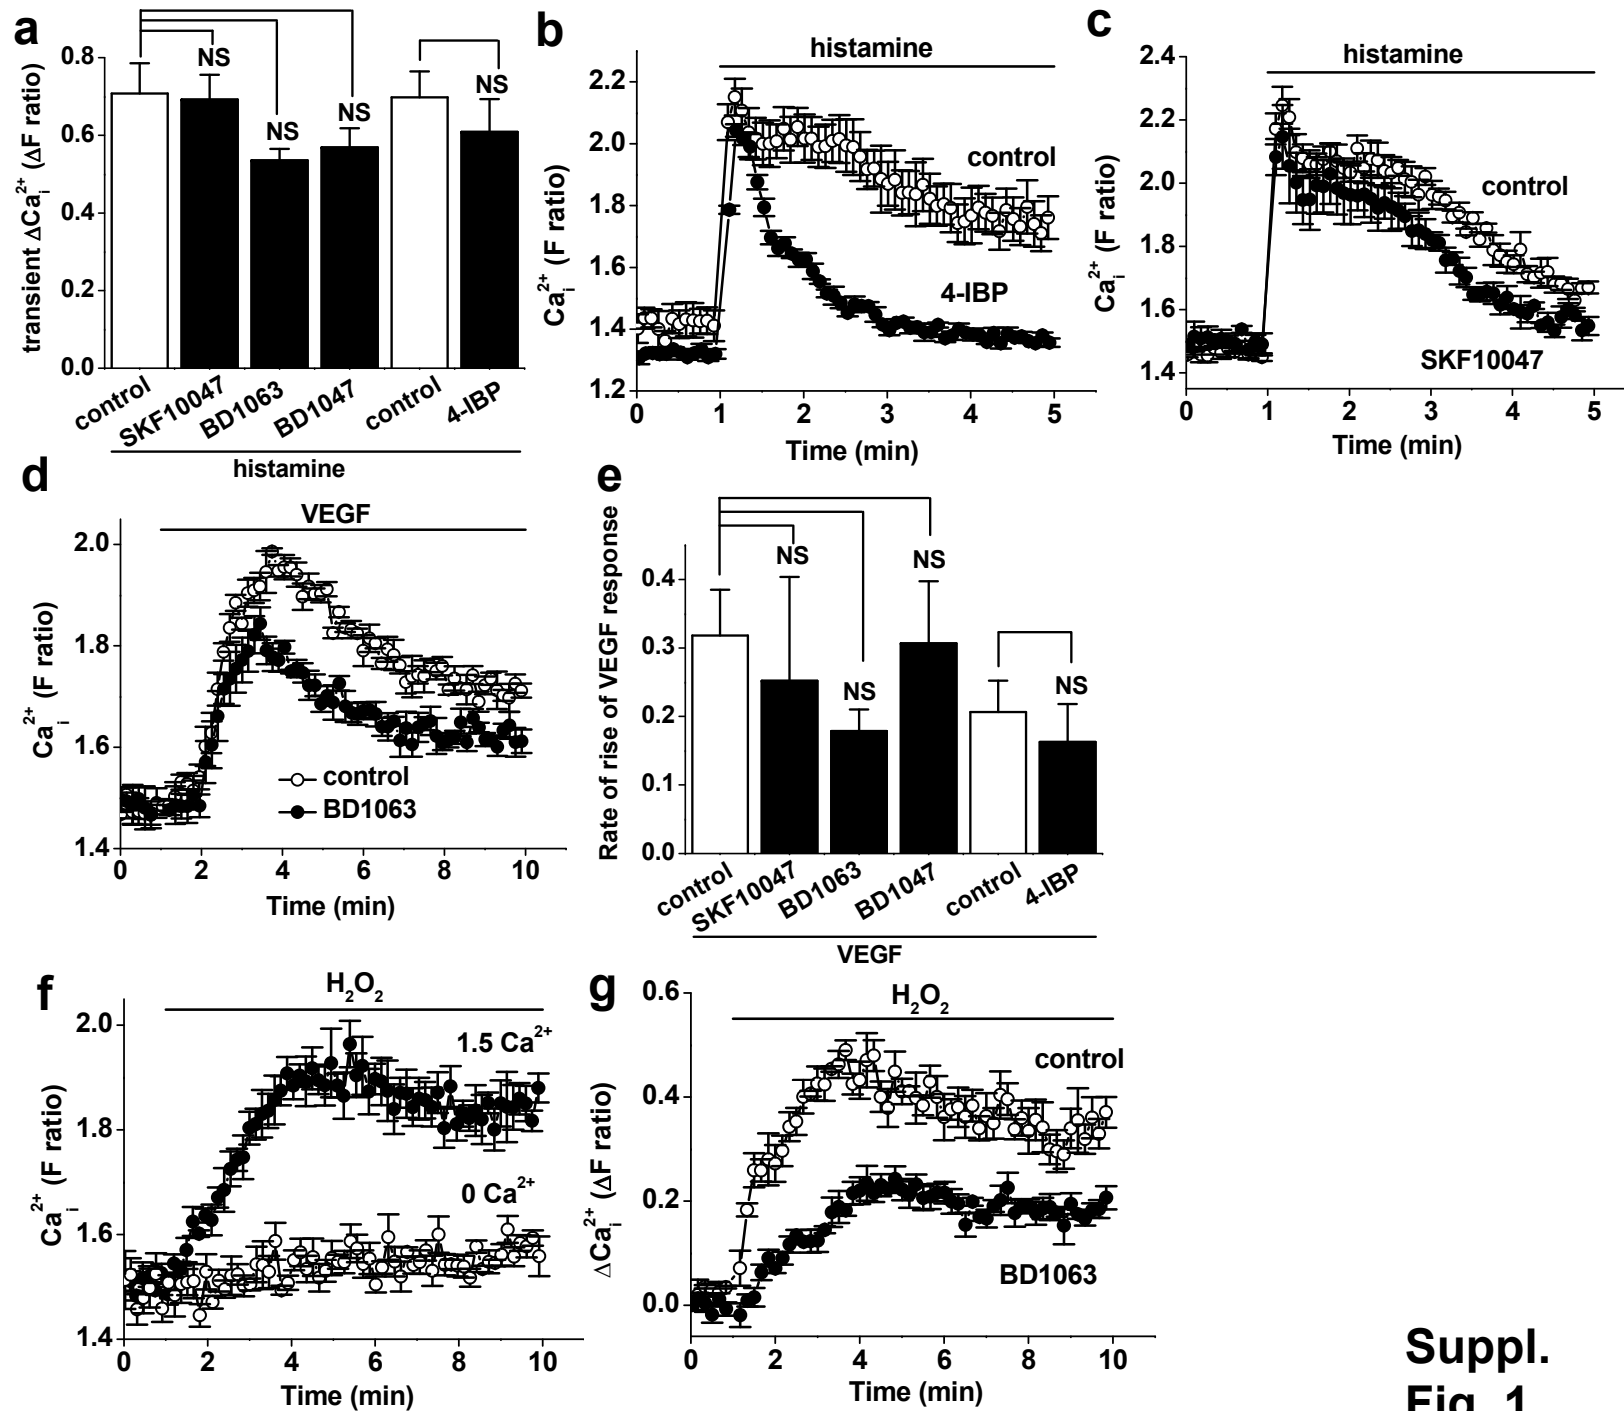

Suppl.  
Fig. 1

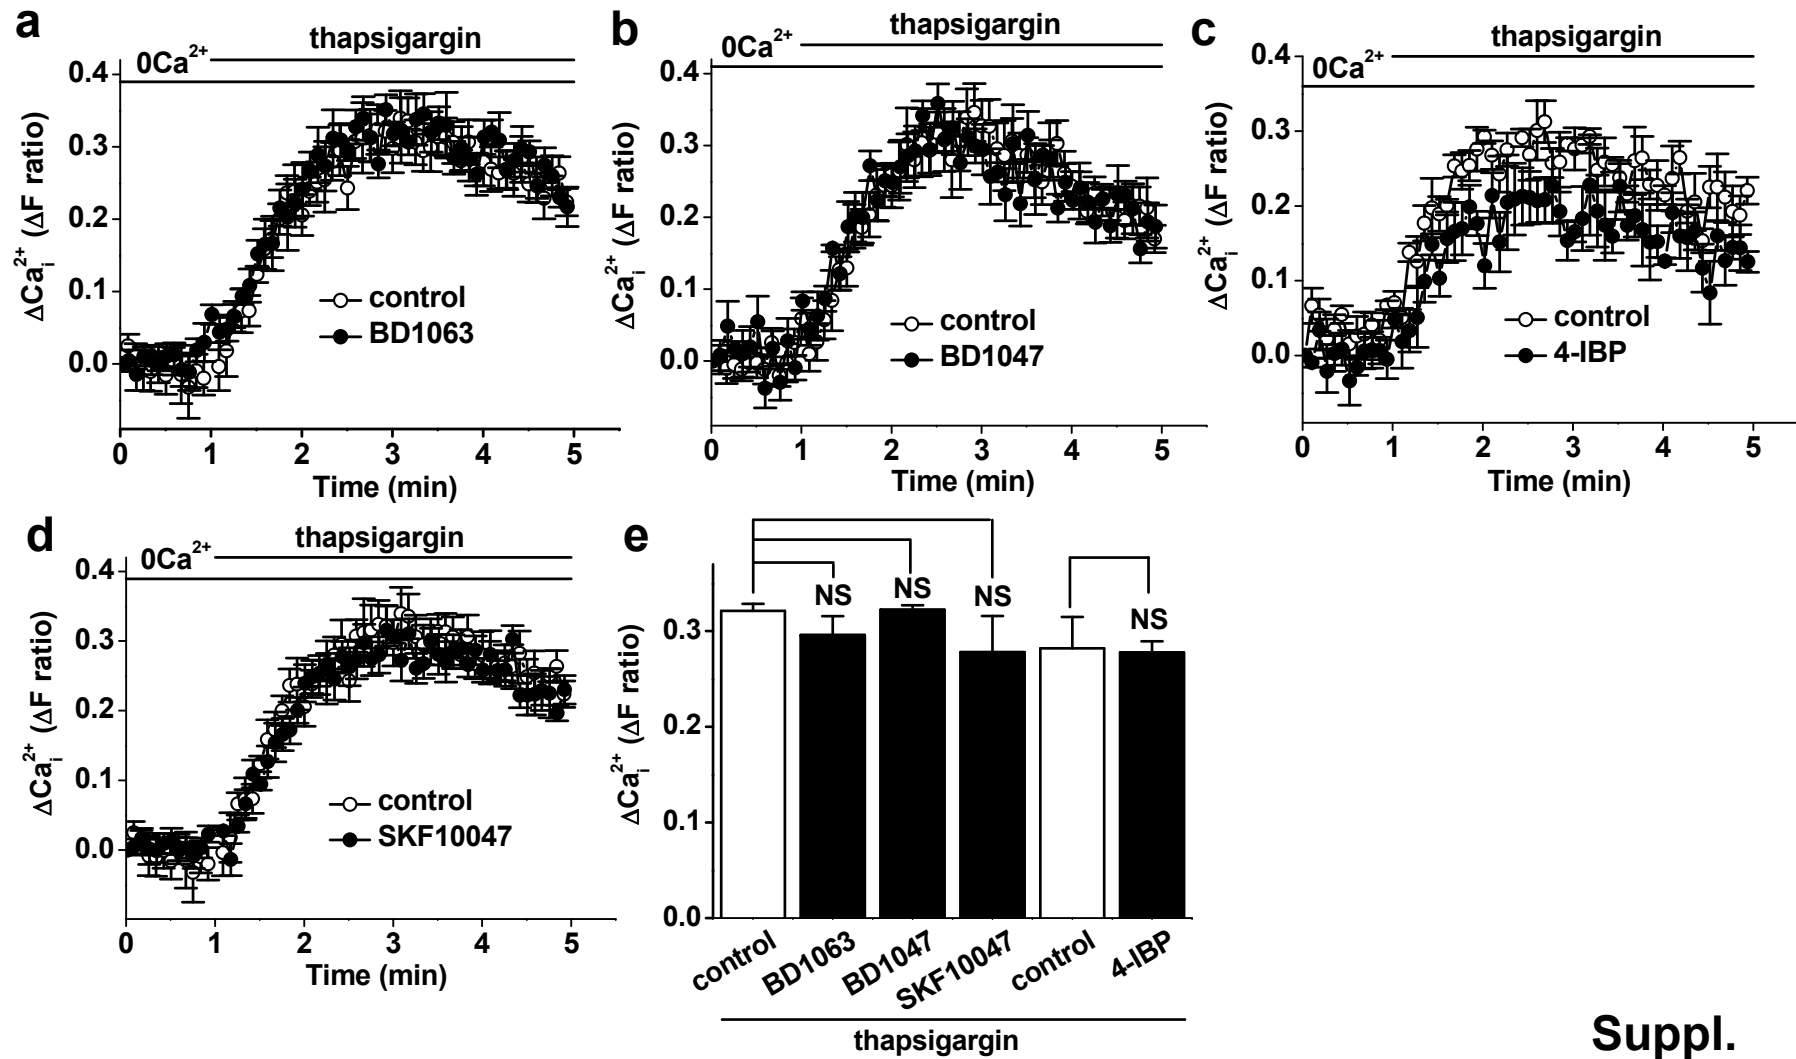

Suppl.  
 Fig. 2

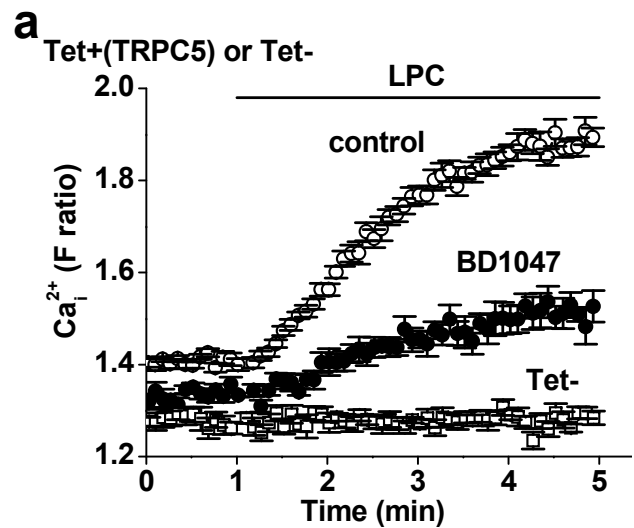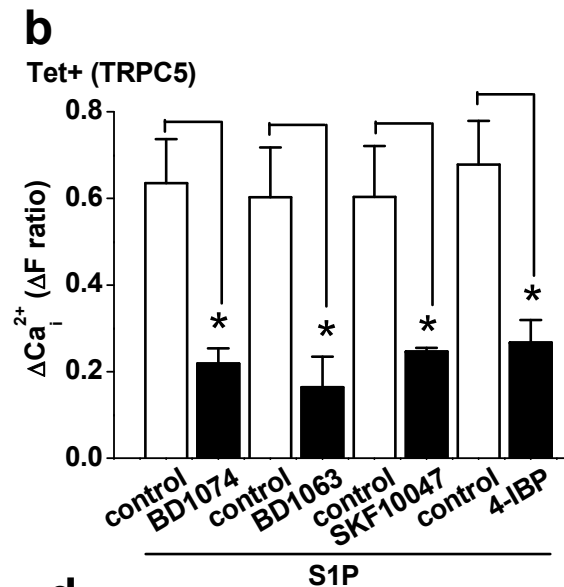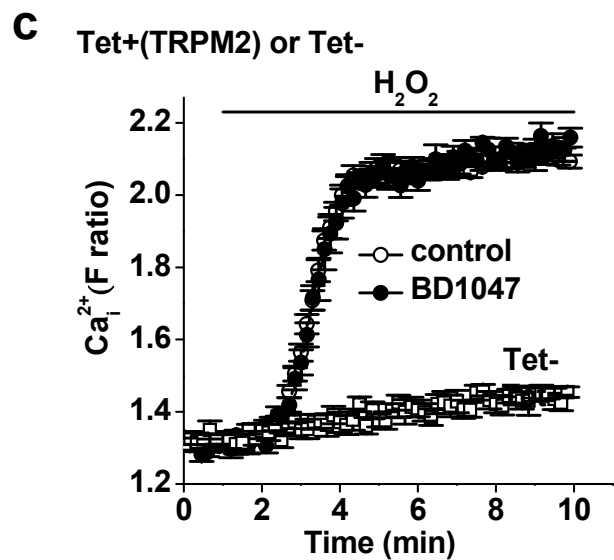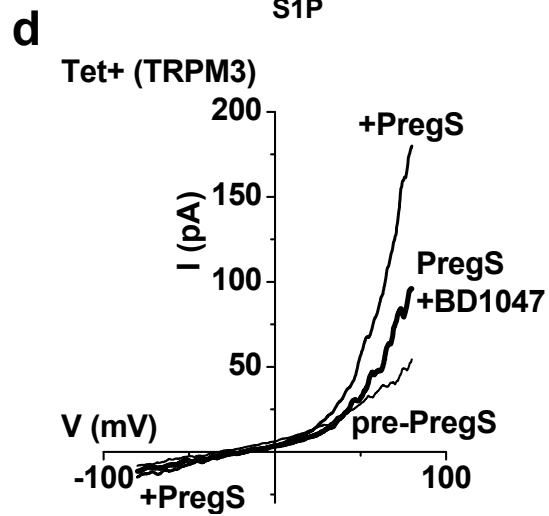

Suppl.  
Fig. 3

**a**

Tet+ (TRPC5) or Tet-

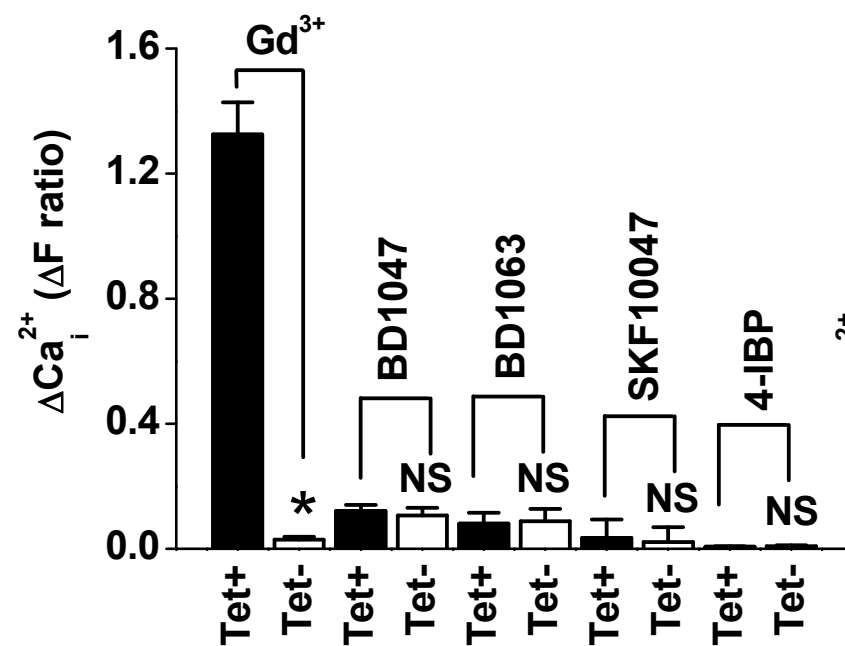**b**

Tet+ (TRPM3) or Tet-

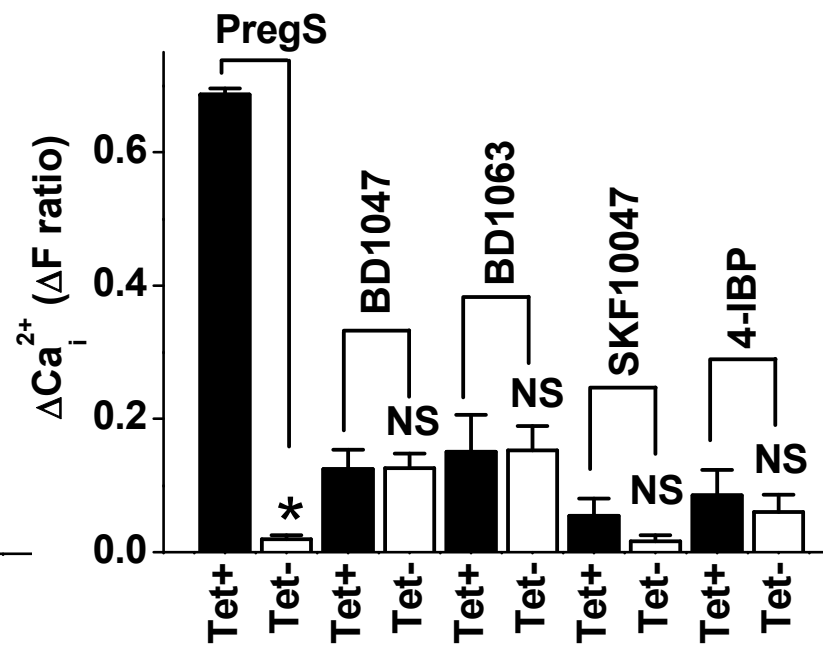Suppl.  
Fig. 4

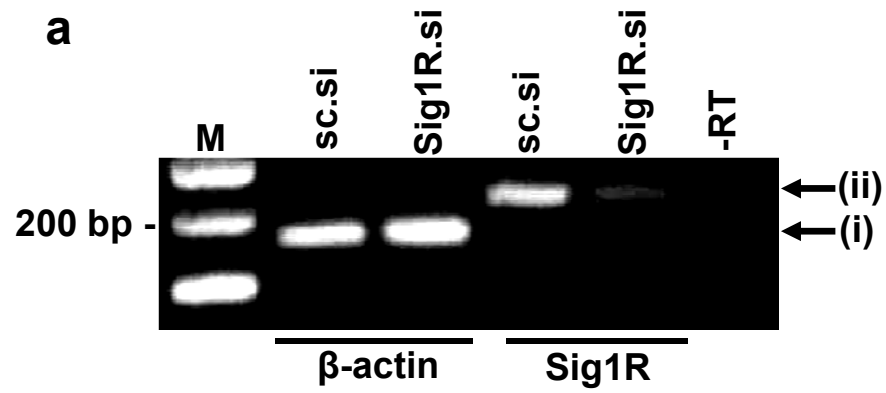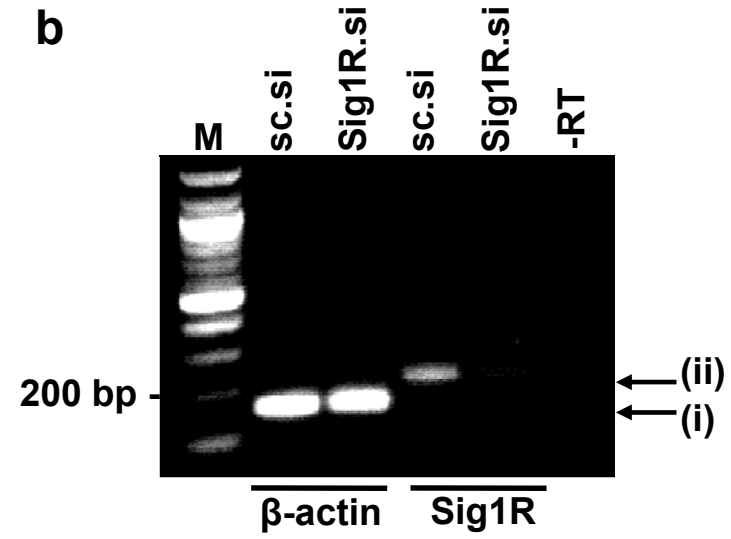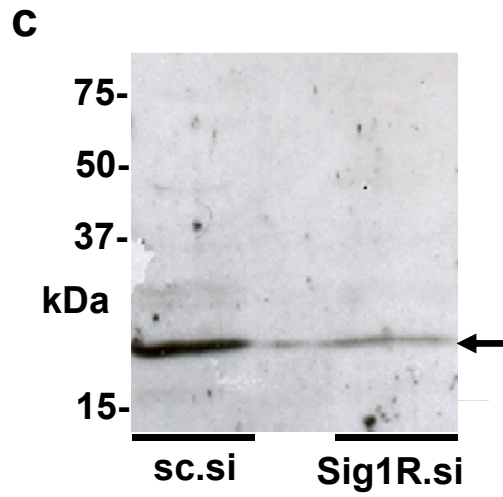

**Suppl.  
Fig. 5**



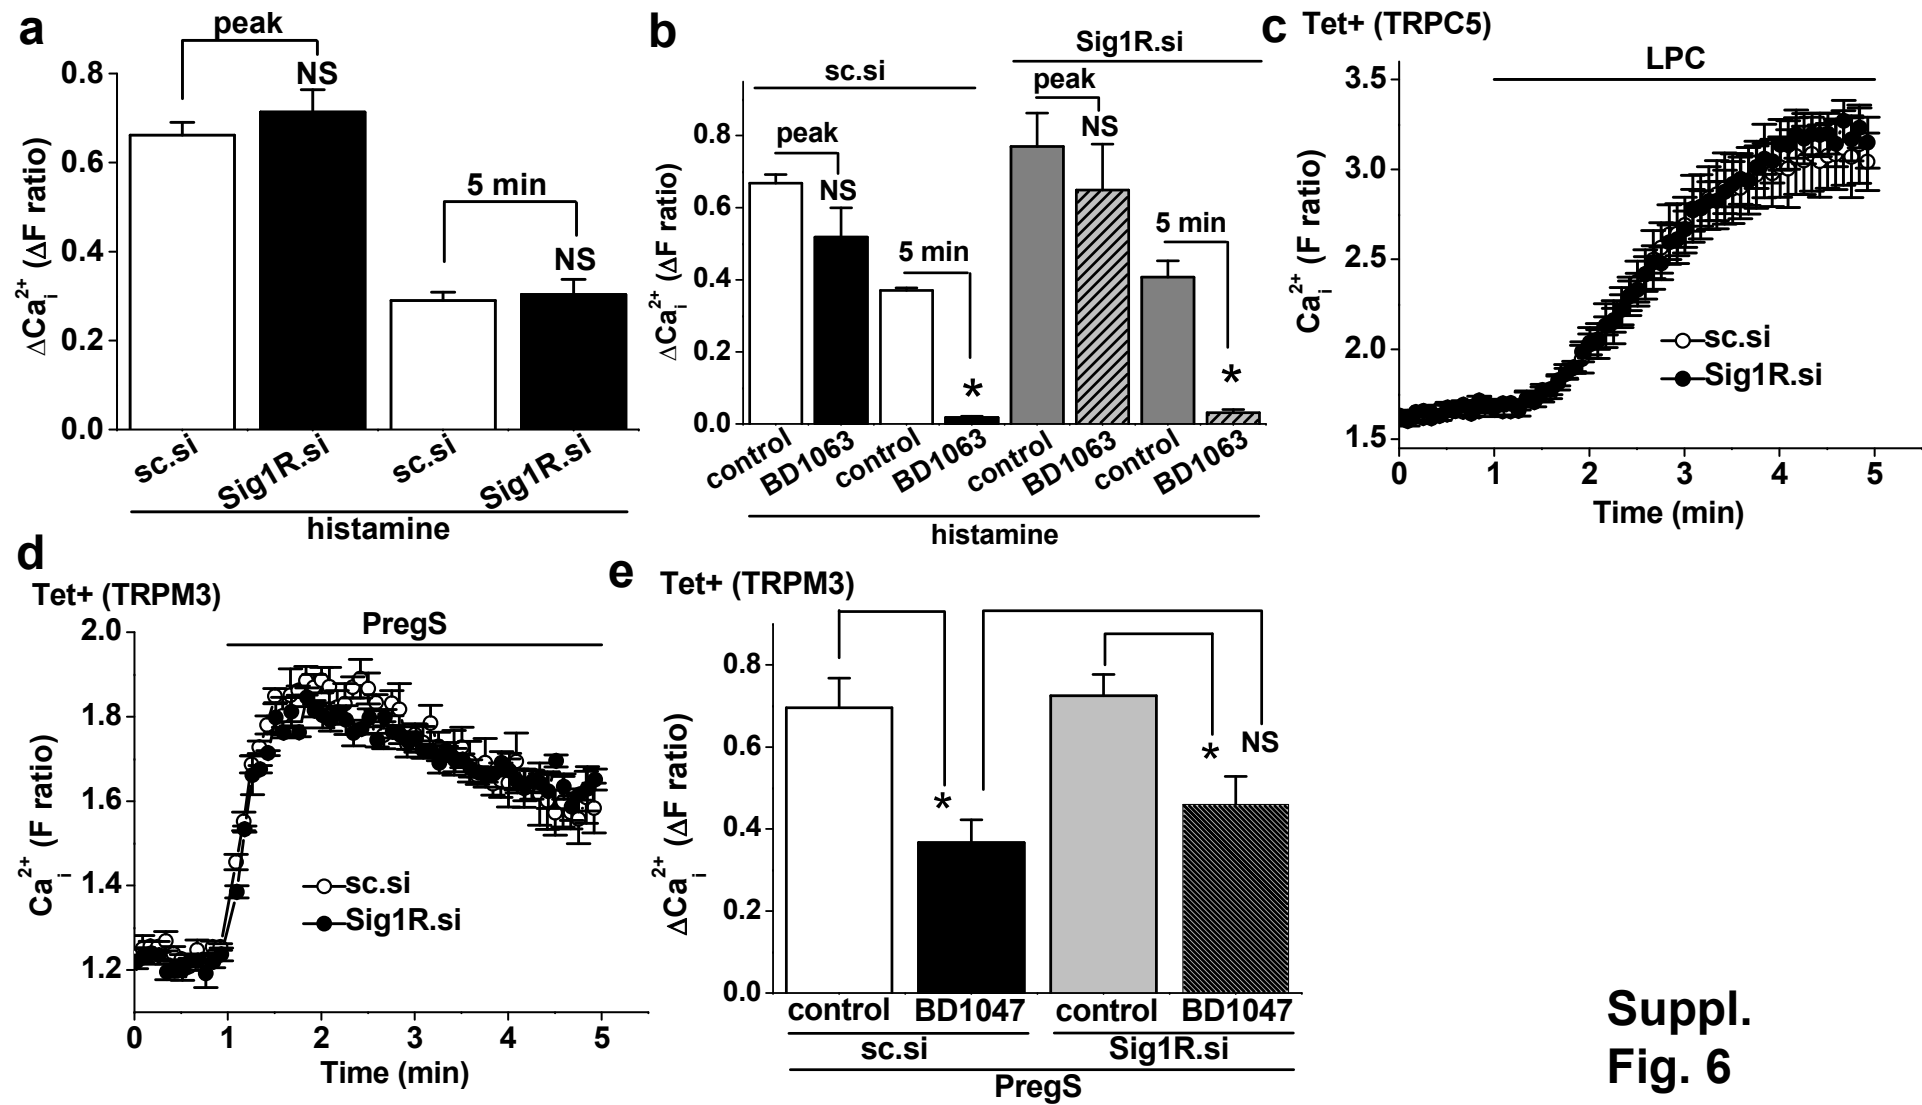

Suppl.  
Fig. 6

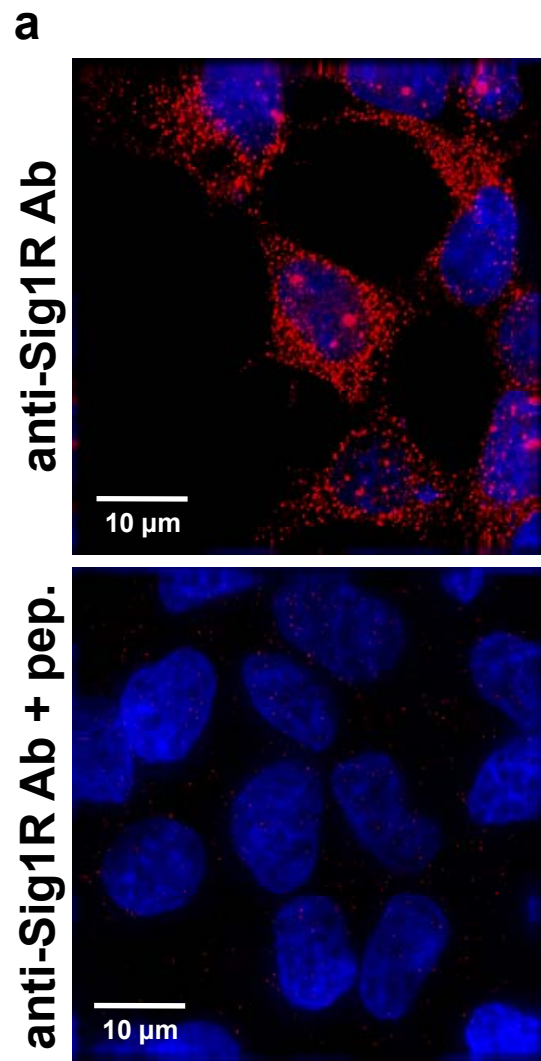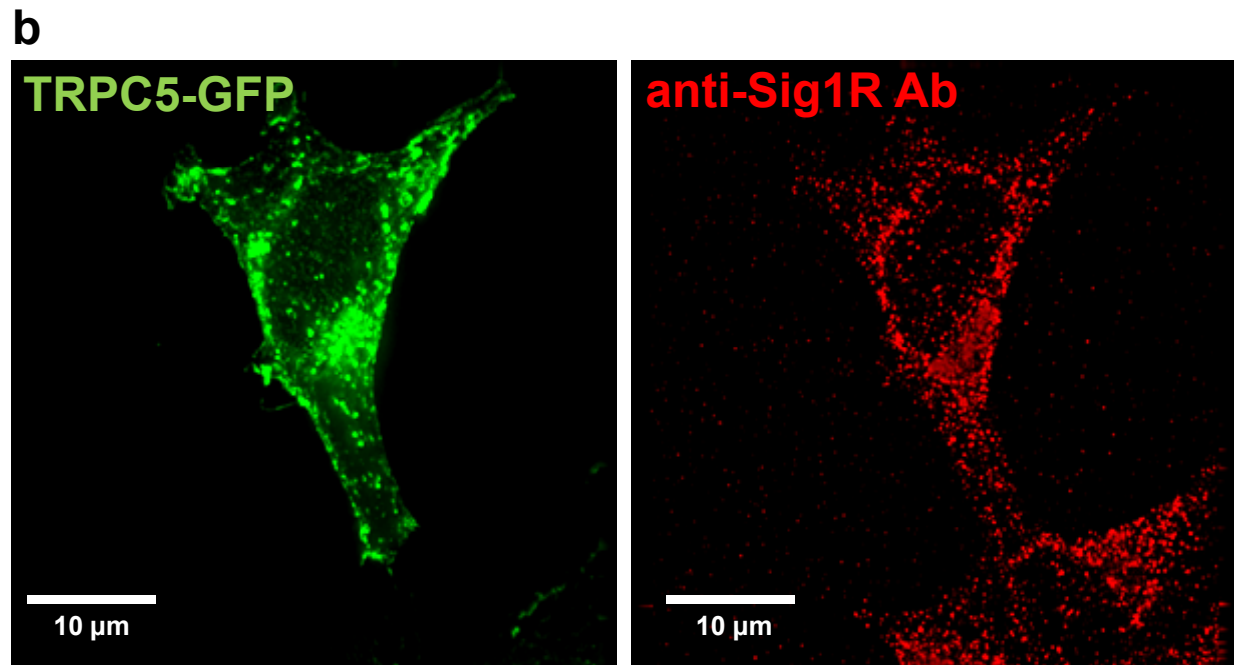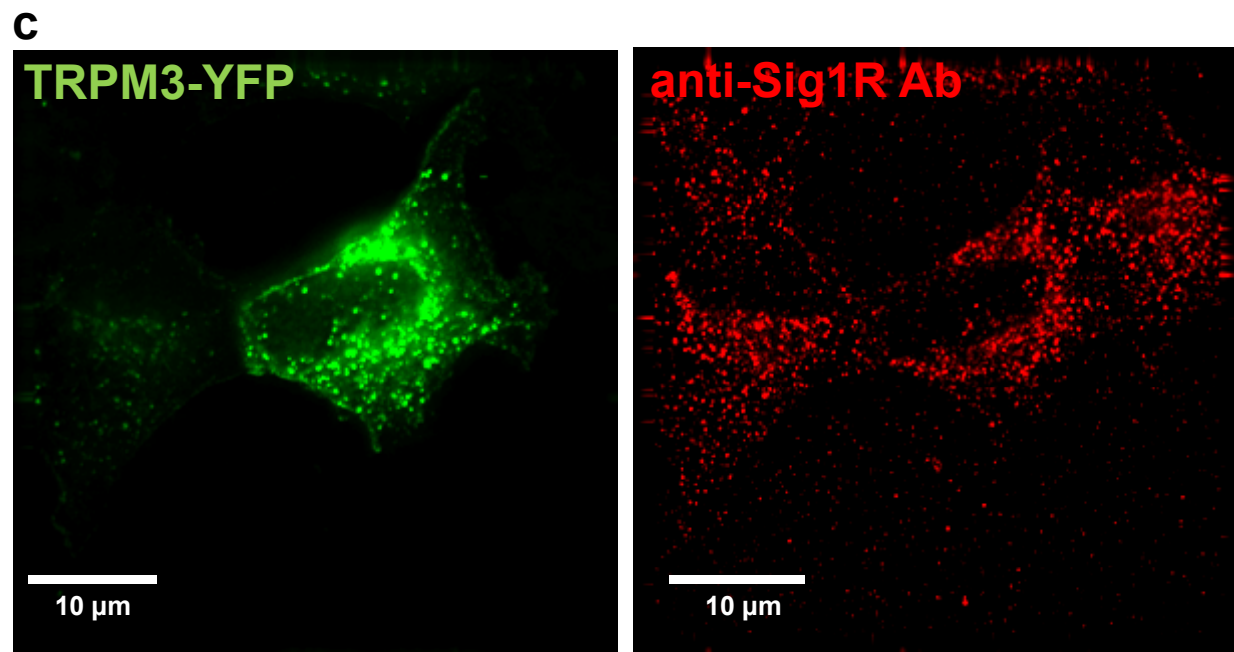

Suppl.  
Fig. 7

**a**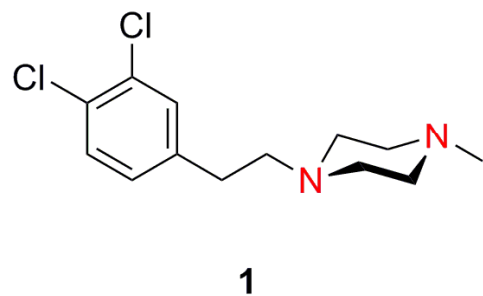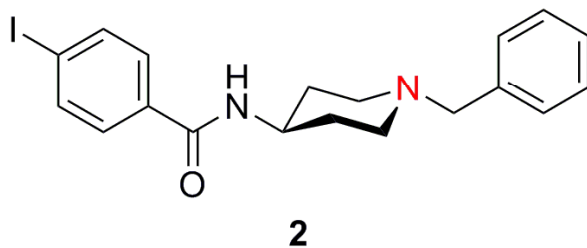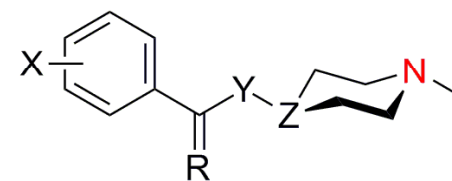

3 X = halogen; Y = C or N;  
Z = N or C; R = H<sub>2</sub> or O

**b**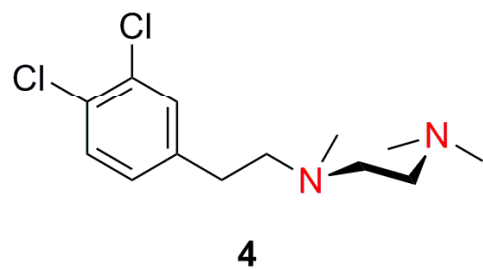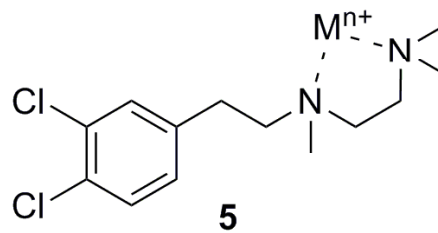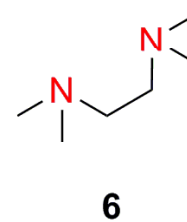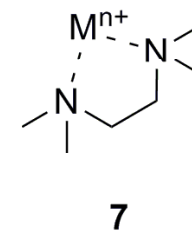**c**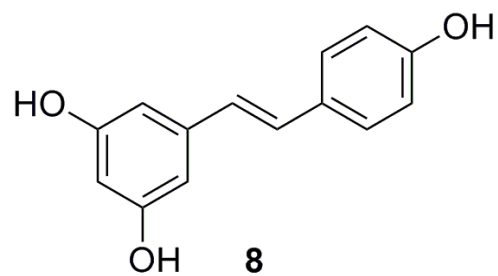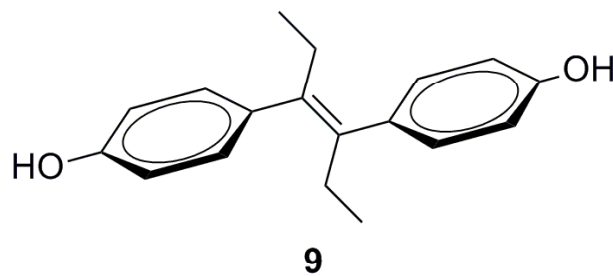

**Suppl.  
Fig. 8**
